# Supplementary material
Source: bioRxiv or medRxiv preprint supplement (https://www.biorxiv.org/highwire/filestream/28450/field_highwire_adjunct_files/3/100131-4.pdf)
Supplement: Supplementary file [file 100131-4.pdf]

## 412 Supplementary Information

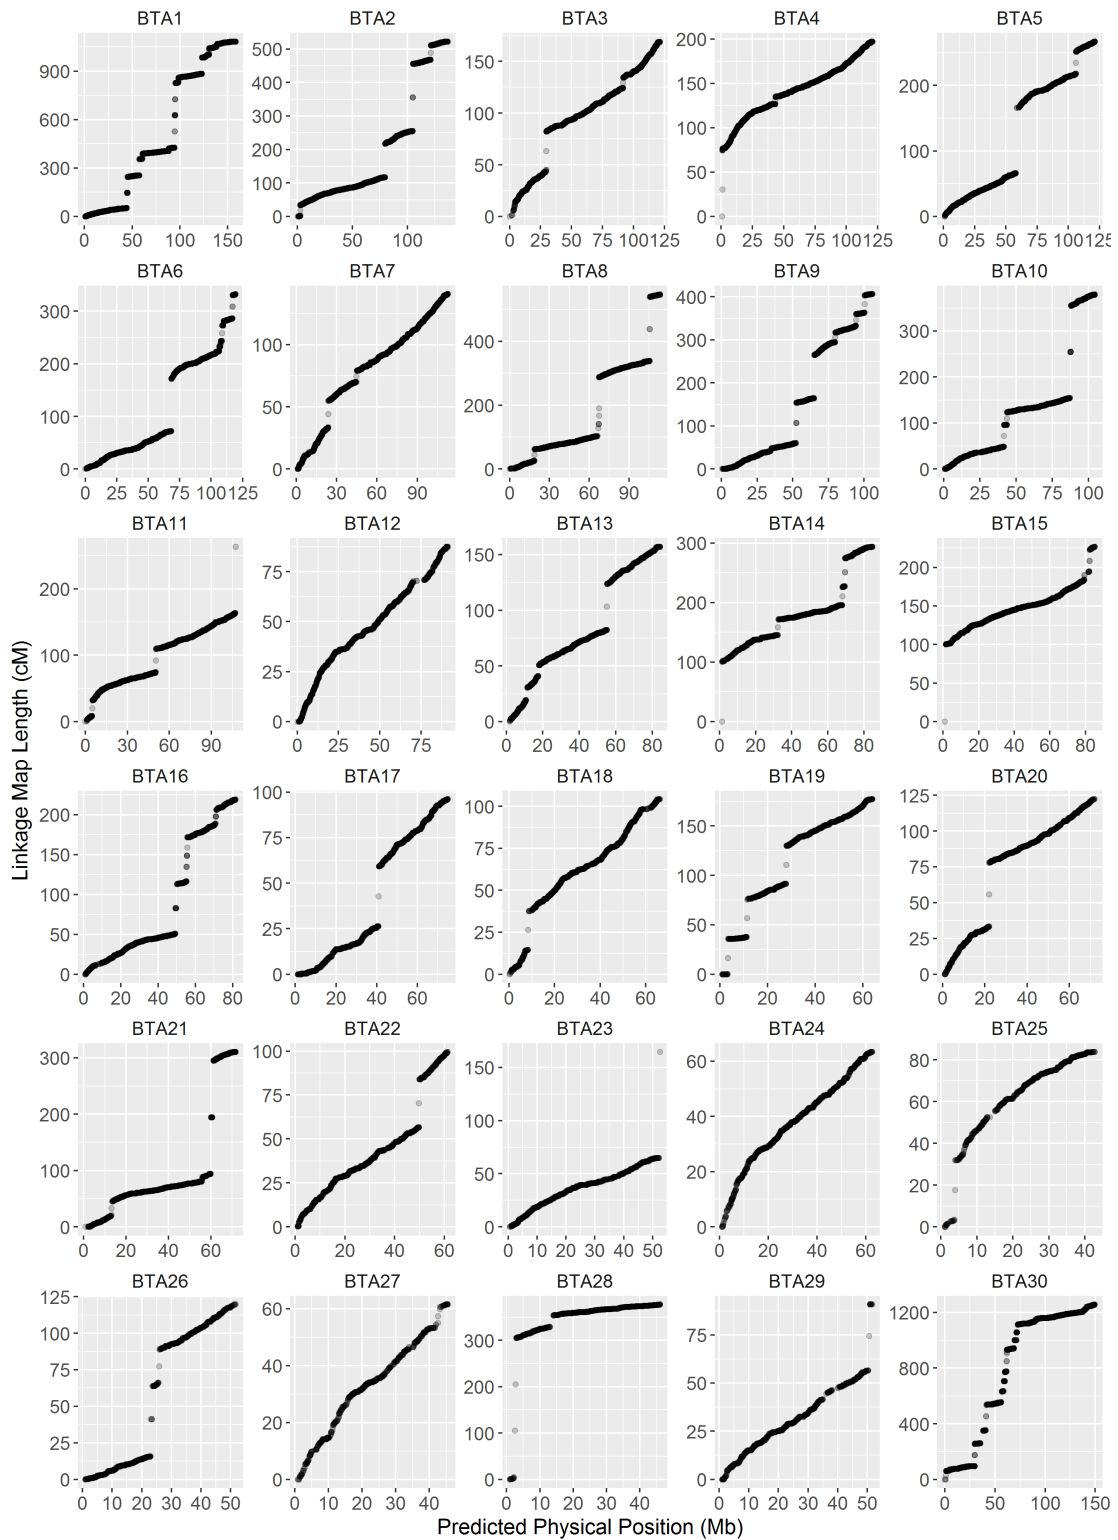

**Figure S1:** Build 1: Sex-averaged linkage maps assuming complete synteny of chromosomes and locus positions with the cattle genome. The x-axis gives the predicted cattle positions, and the y-axis gives the linkage map positions.

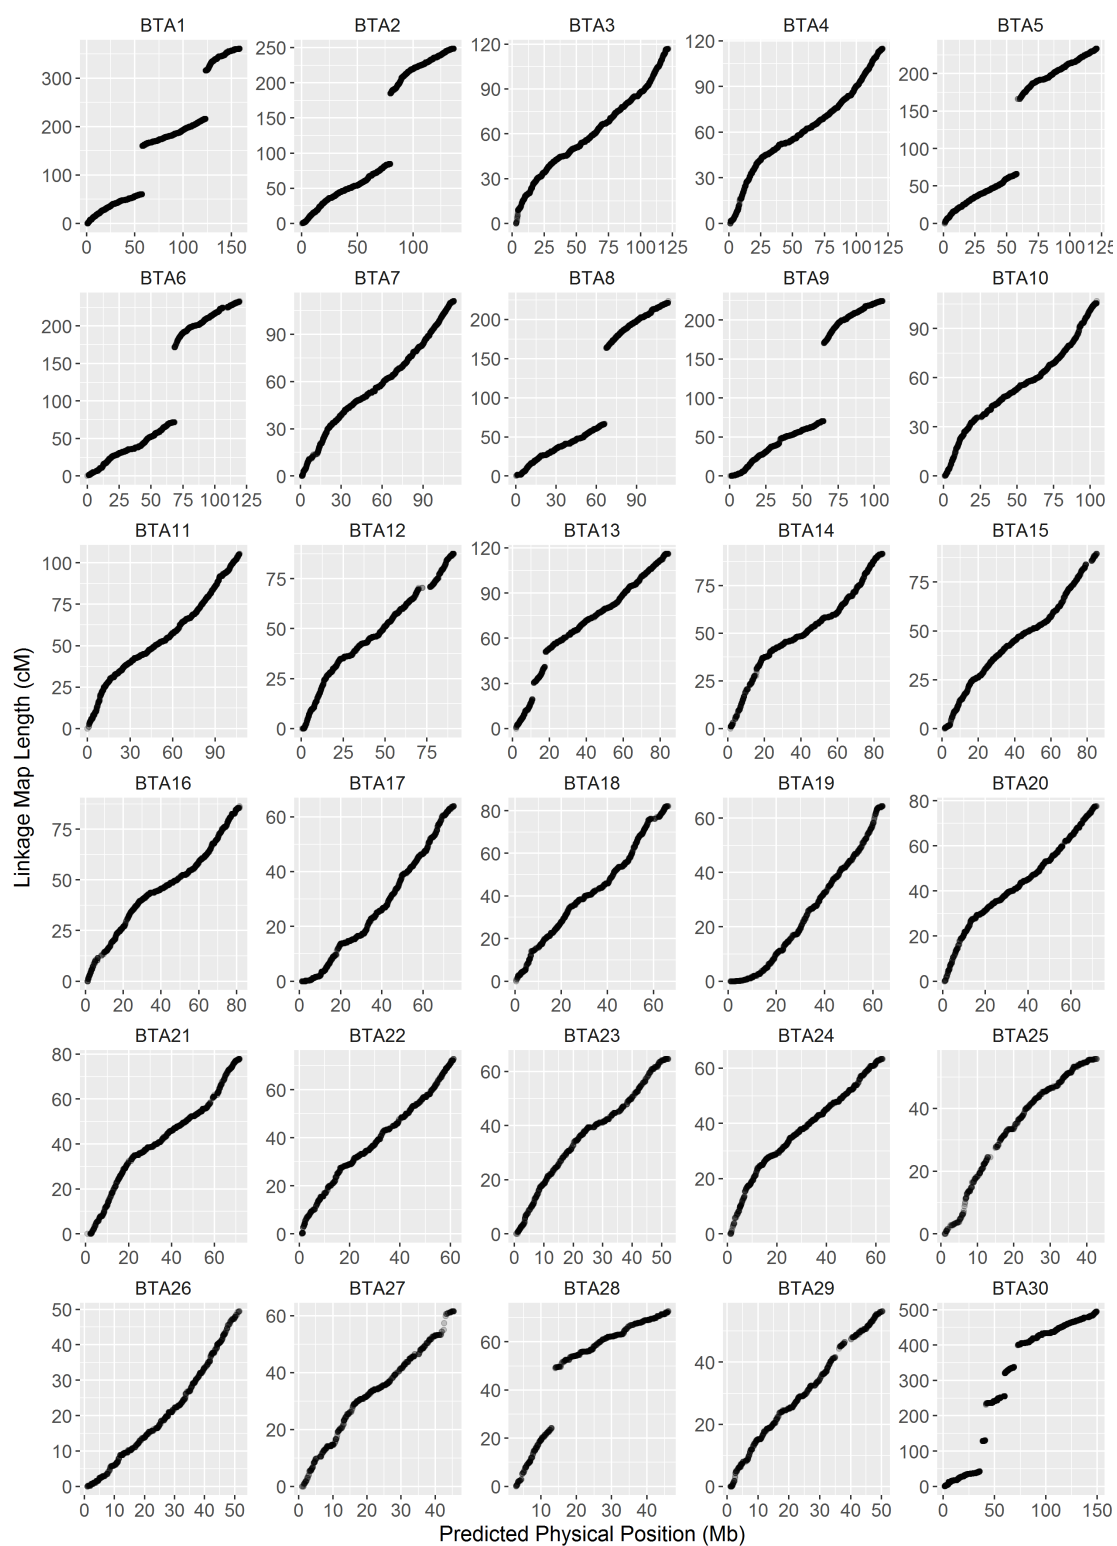

**Figure S2:** Build 2: Sex-averaged linkage maps after removing SNPs that were predicted to be wrongly mapped. Chromosome numbers are based on synteny with the cattle genome. The x-axis gives the predicted cattle positions, and the y-axis gives the linkage map positions.

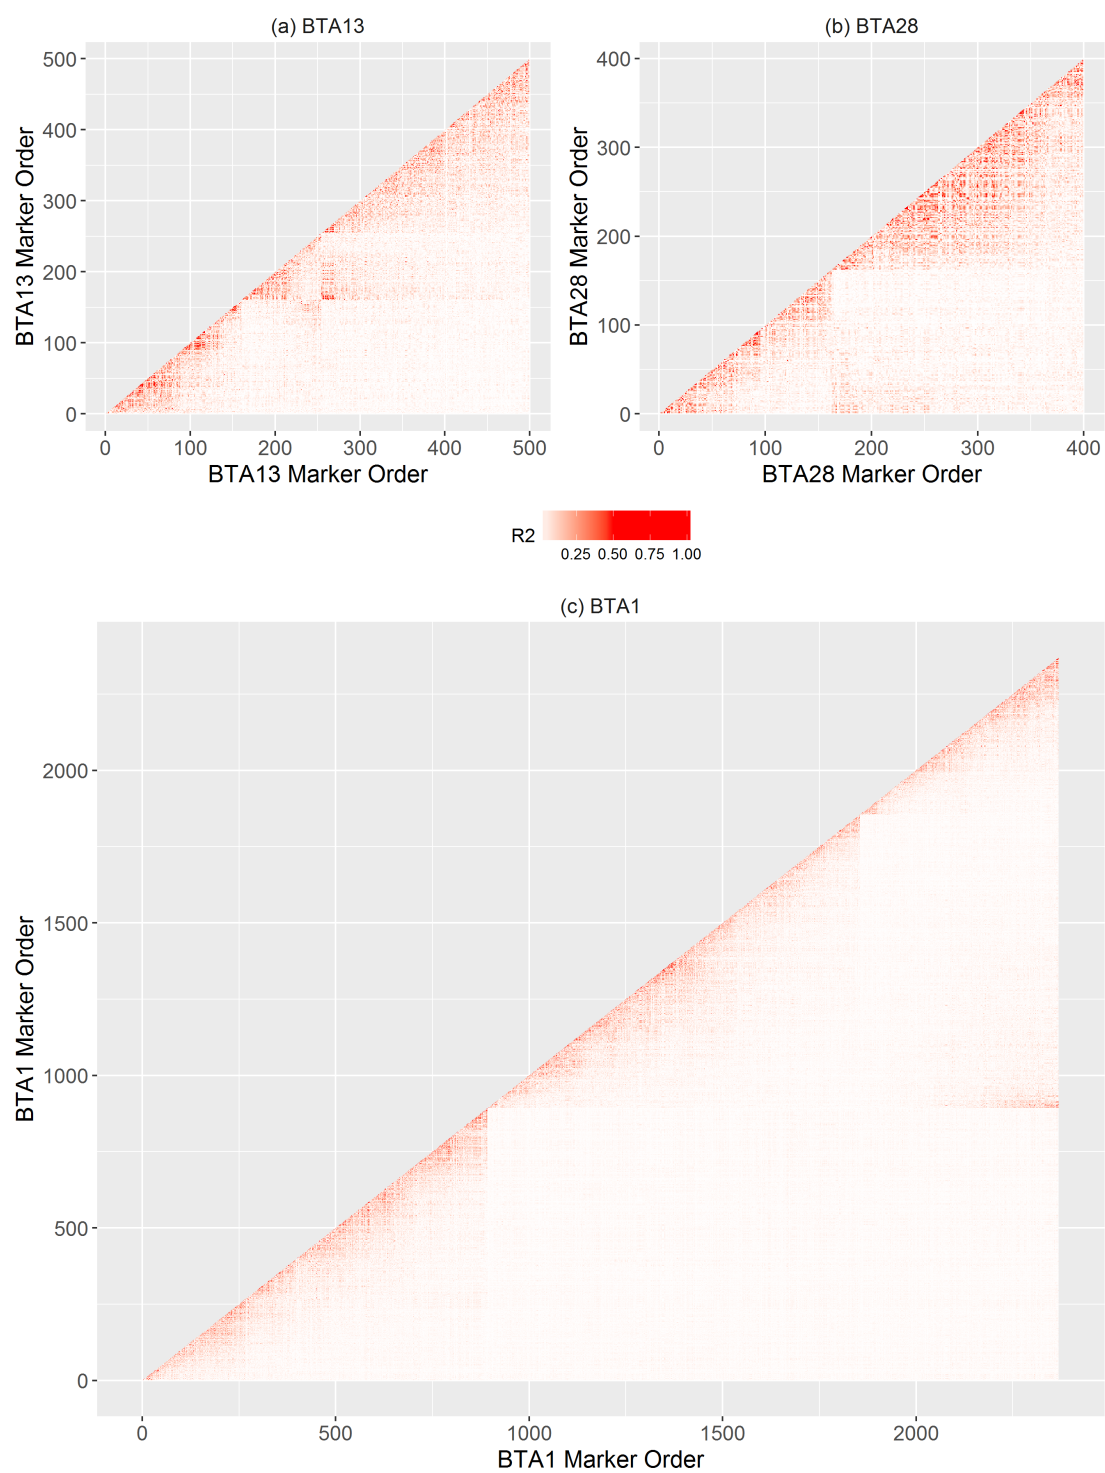

**Figure S3:** Patterns of LD ( $R^2$ ) on (a) BTA13, (b) BTA28 and (c) all SNPs on BTA1.

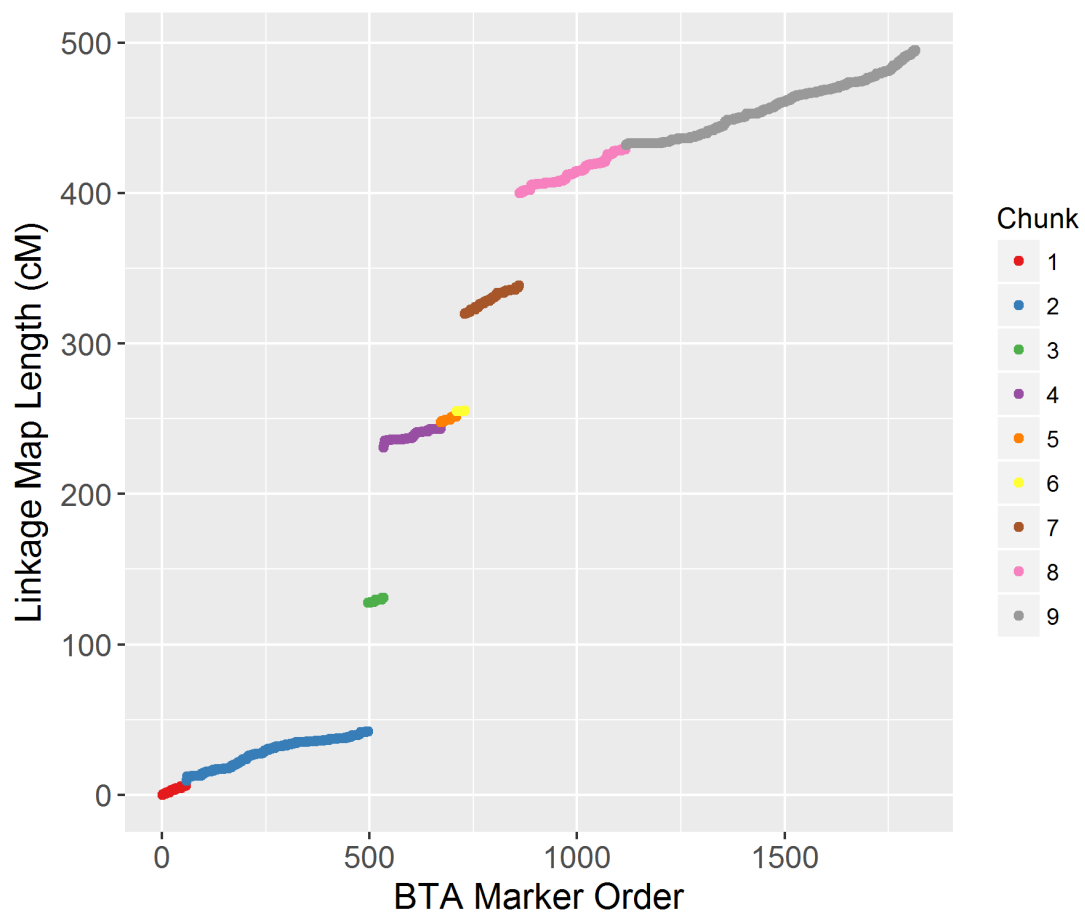

**Figure S4:** Marker order and linkage map distance on BTA30 (CEL34) after Build 2. Colours indicate chunks flanked by recombination fractions of  $\geq 3\text{cM}$ .

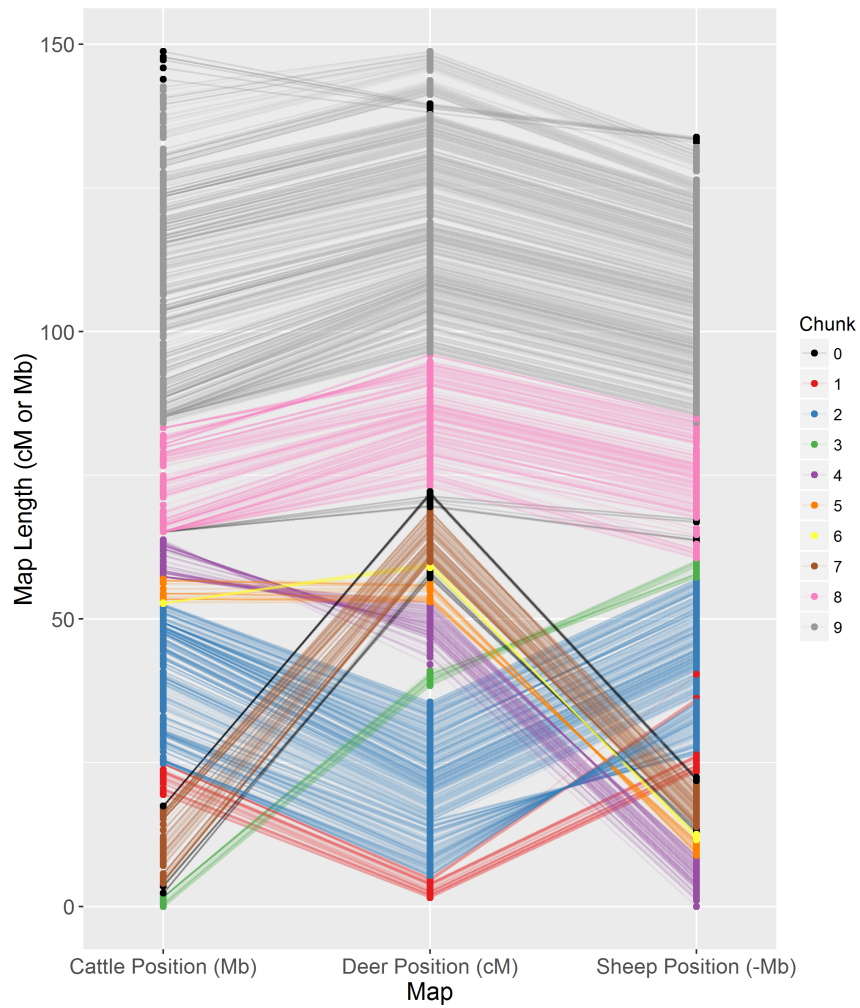

**Figure S5:** Comparison of map positions on the X chromosome between cattle (BTA30, distance in Mb from genome build BTA vUMD 3.0), deer (CEL34, distance in cM from Build 5) and sheep (OAR27, distance in Mb and reversed from genome build Oar\_v3.1). Colours indicate chunks flanked by recombination fractions of  $\geq 3\text{cM}$  in Build 2. Chunk 0 indicates markers unmapped in Build 2 that were retrospectively added to Build 5. Full data for this figure is provided in Table S2.

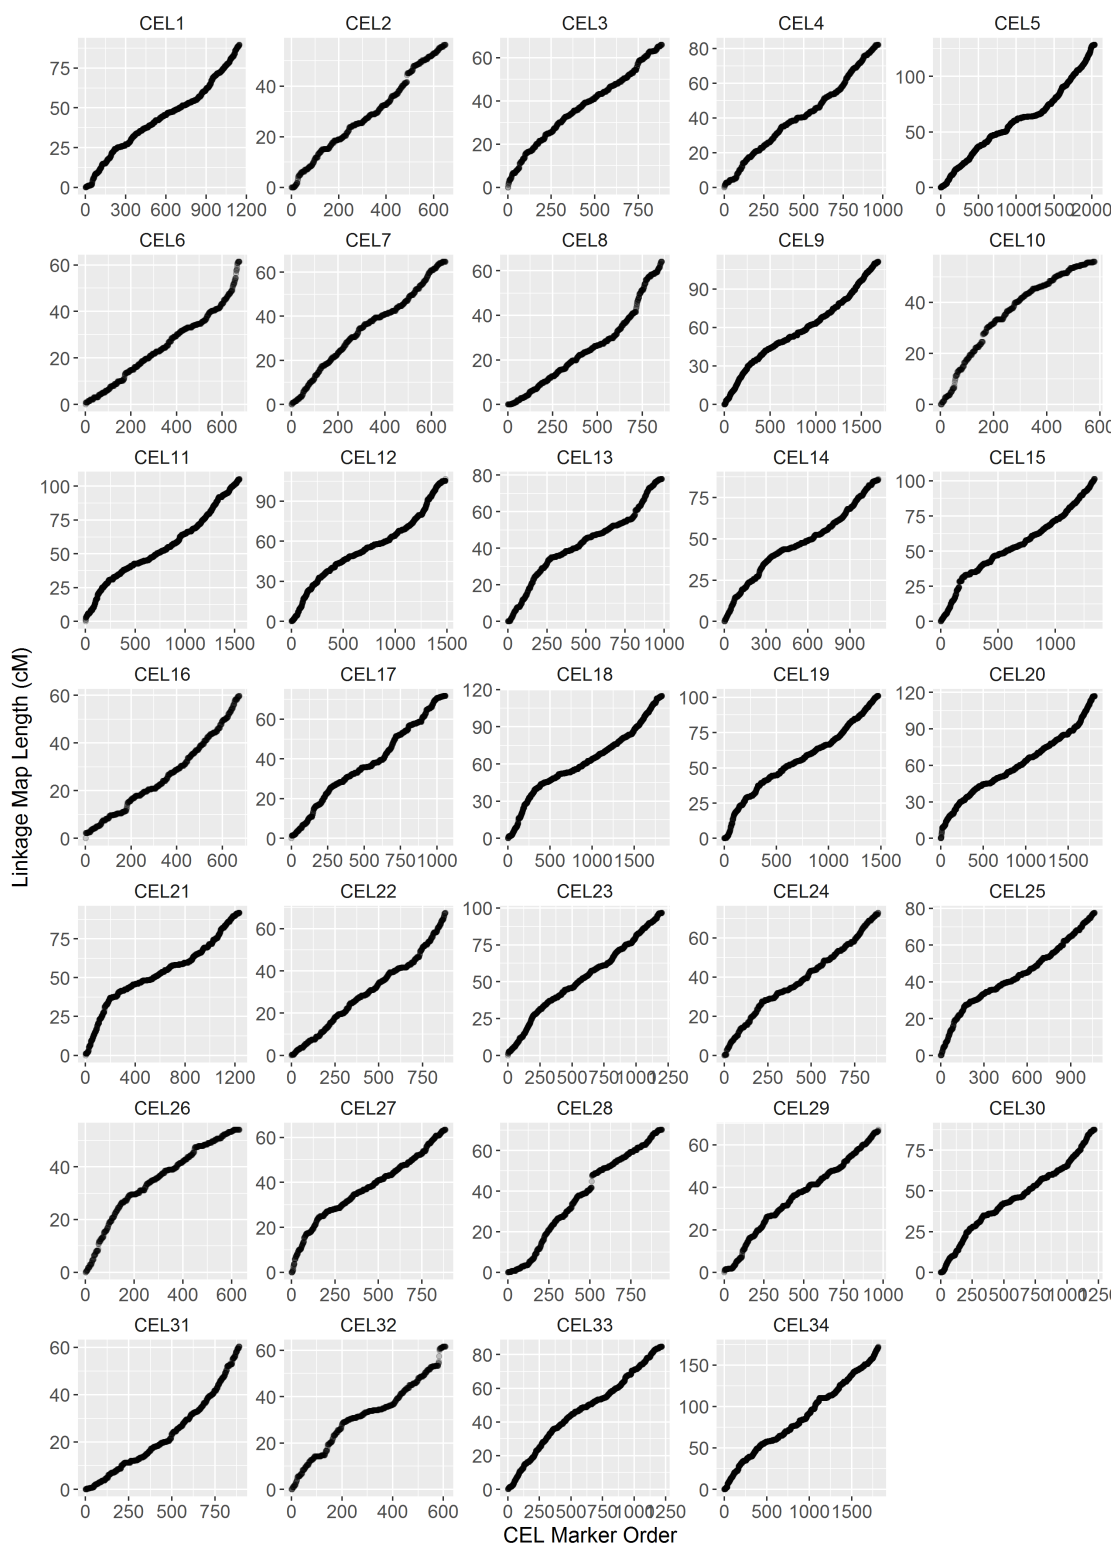

**Figure S6:** Build 3: Sex-averaged linkage maps after carrying out chromosomal re-arrangements outlined in the main text. Chromosome numbers are *Cervus elaphus* (CEL) linkage groups assuming grouping as in Slate *et al* (Slate *et al.*, 2002) (Table ??). The x-axis gives the predicted order of the deer loci on the linkage groups after Build 3.

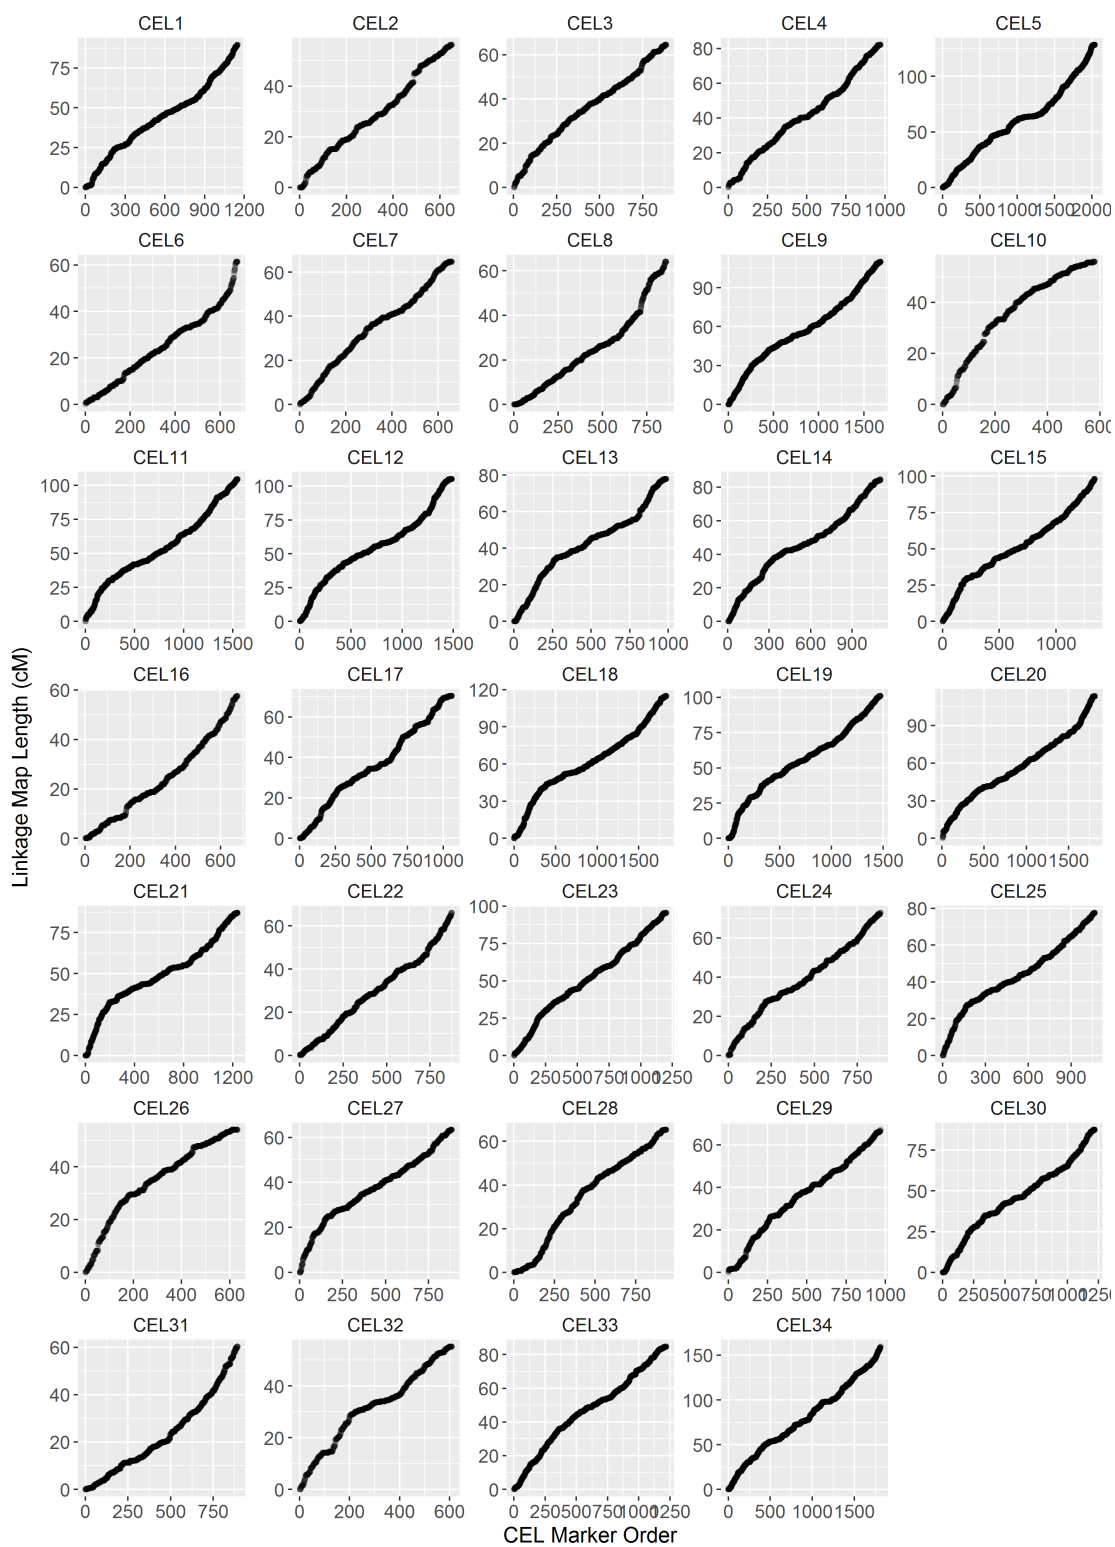

**Figure S7:** Build 4: Sex-averaged linkage maps after testing inversion and deletion of short chunks as outlined in the main text. Chromosome numbers are *Cervus elaphus* (CEL) linkage groups. The x-axis gives the predicted order of the deer loci on the linkage groups after Build 4.

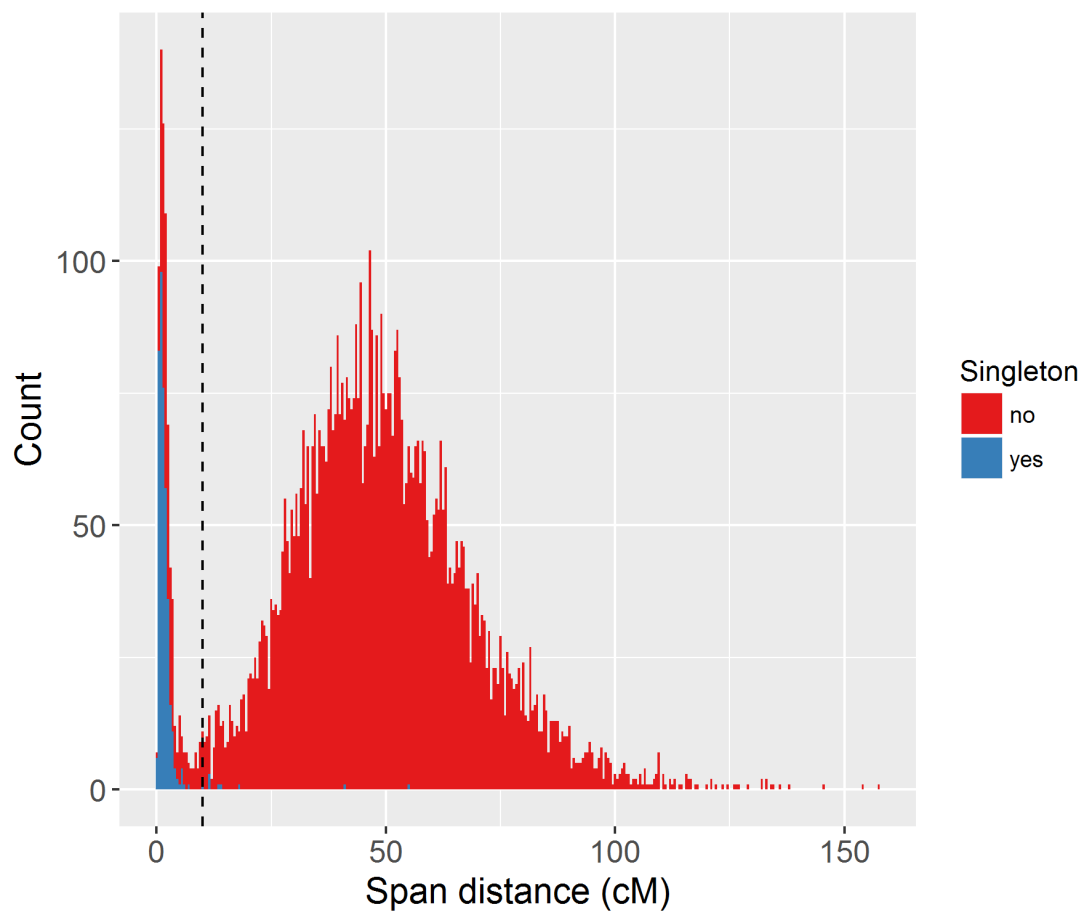

**Figure S8:** Histogram of the span distances (in Mb) between double crossovers on autosomal chromatids. Bar segments are colour coded as double crossovers spanning a single SNP locus (blue) and those spanning more than one SNP (red). All double crossovers across a single SNP were discarded from the dataset, as they are likely to be the result of a genotyping error at that SNP. Short crossovers below a span distance of 10cM were also discarded (see text for rationale)



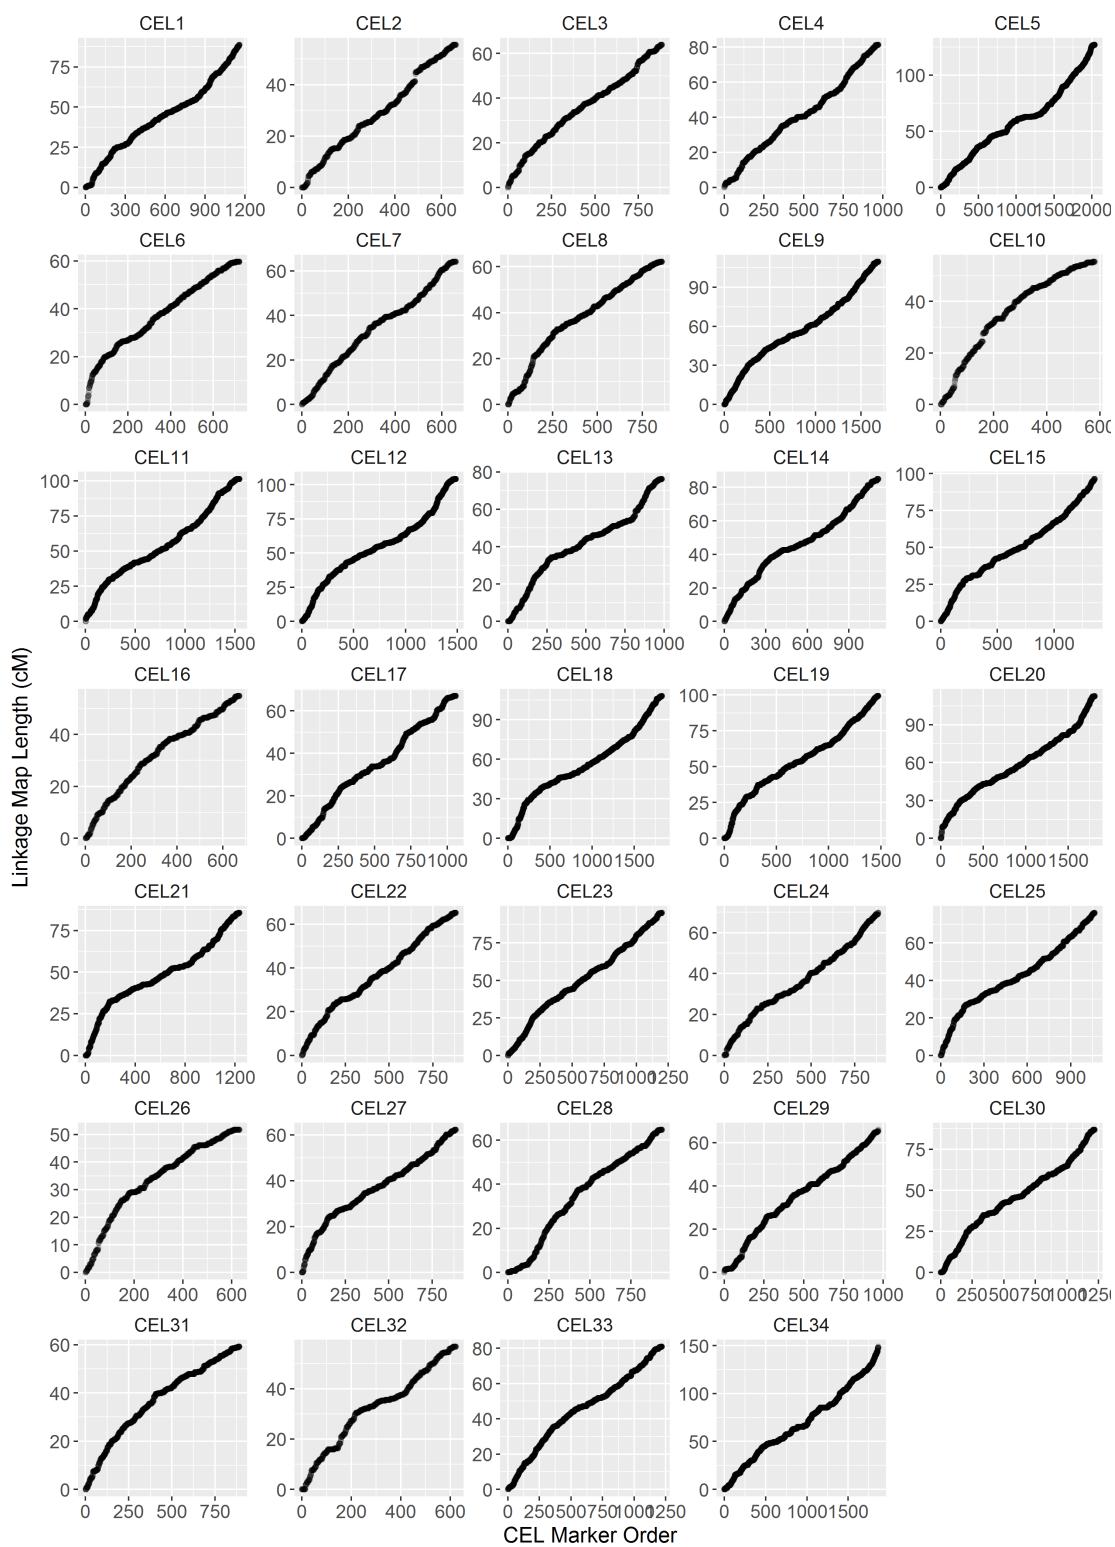

**Figure S9:** Build 5: Sex-averaged linkage maps after removing incorrectly-called double crossovers. Chromosome numbers are *Cervus elaphus* (CEL) linkage groups. The x-axis gives the predicted order of the deer loci on the linkage groups after Build 4, and the y-axis gives the linkage map positions.

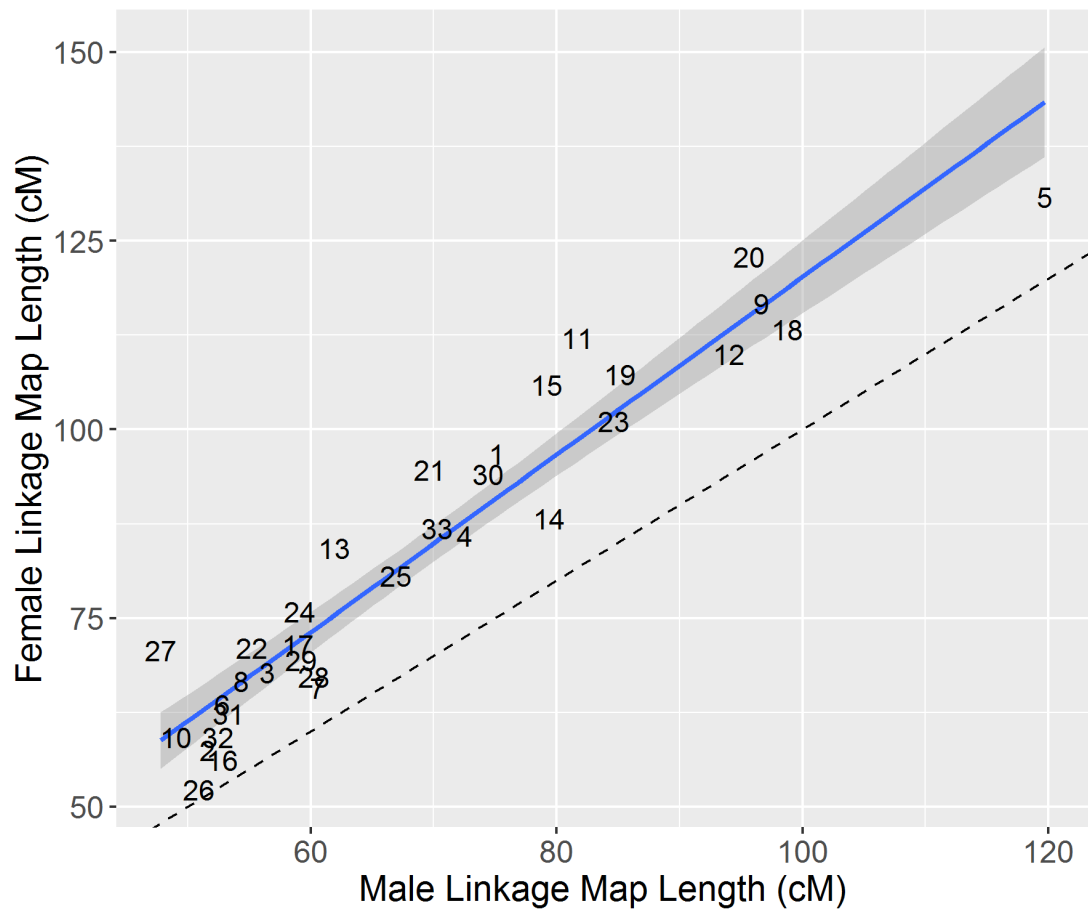

**Figure S10:** Correlation between male and female linkage map lengths (cM). The line and the gray-shaded area indicates the regression slope and standard error, respectively. The dashed line in C indicates where male and female linkage maps would be of equal length.

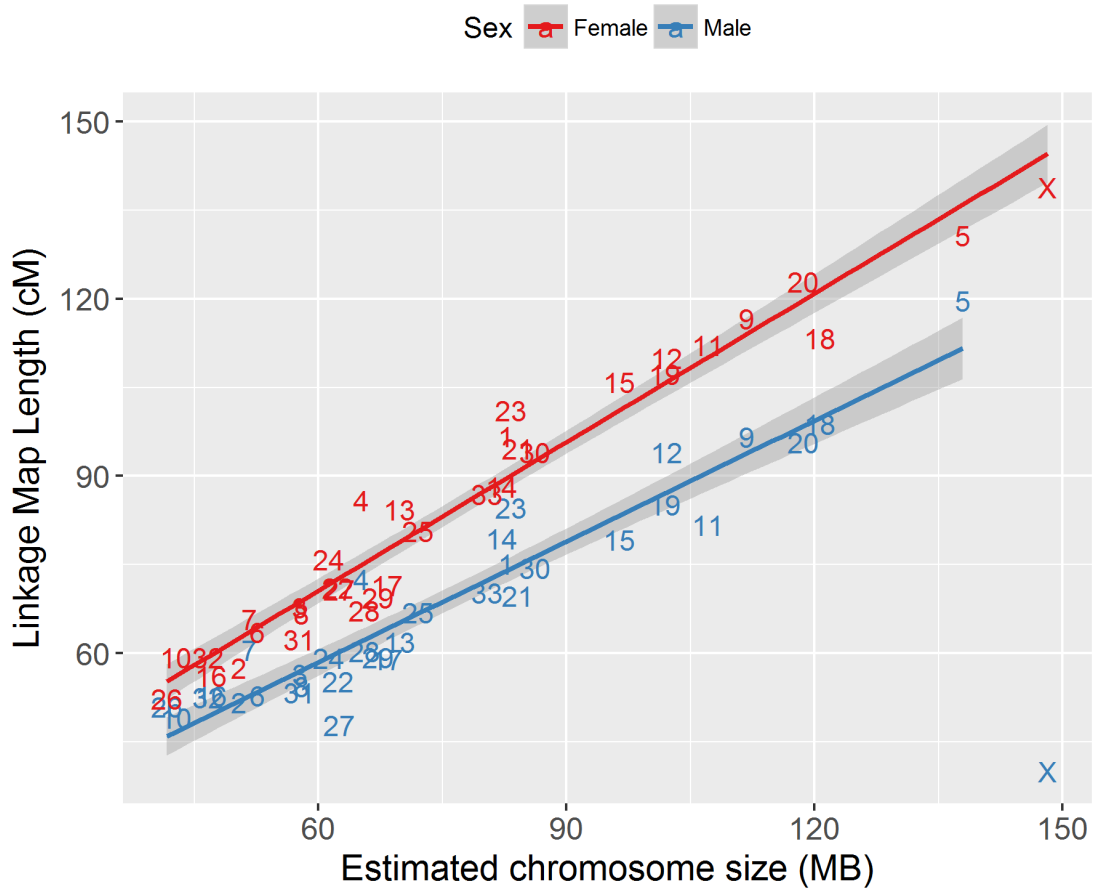

**Figure S11:** Sex-specific correlations between male and female linkage map lengths (cM). The line and the gray-shaded area indicates the regression slope and standard error, respectively.

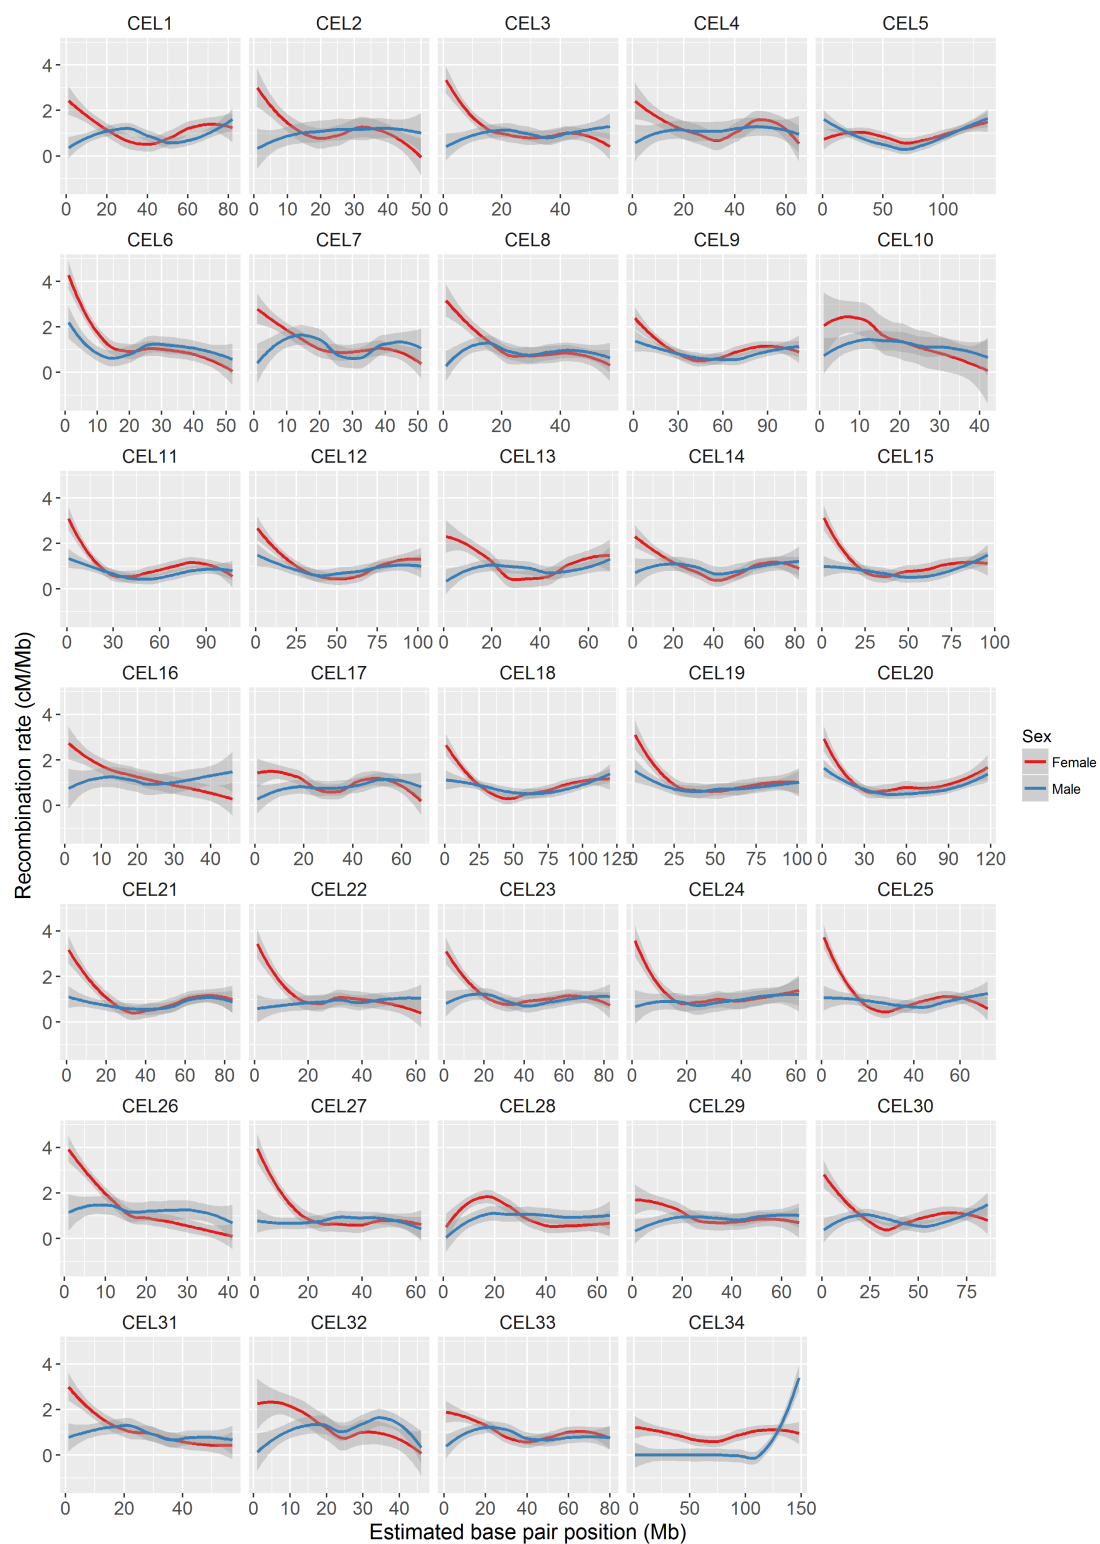

**Figure S12:** Loess smoothed splines of recombination rates in 1Mb windows across 33 autosomes for males and females. With the exception of one unknown linkage group, all chromosomes are acrocentric with the centromere at the beginning of the chromosome (Gustavsson & Sundt, 1968).

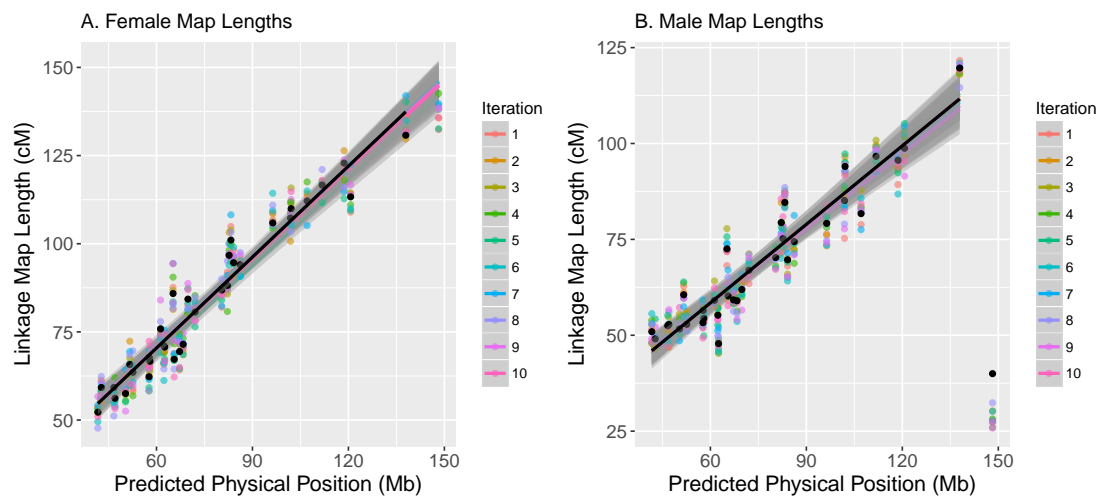

**Figure S13:** Correlations between the predicted physical position (Mb) and linkage map lengths (cM) for ten subsets of 483 females (A) and males (B) randomly sampled with replacement (coloured lines) and as observed in the data (black line).

**Table S1:** Rum red deer (*Cervus elaphus*) linkage map after Build 5. Table is provided in file TableS1\_CervusElaphus\_Final\_Linkage\_Map.txt Column header are as follows:

|                        |                                                                         |
|------------------------|-------------------------------------------------------------------------|
| SNP.Name               | SNP Name                                                                |
| BTA.Chr                | cattle chromosome                                                       |
| BTA.Position           | cattle base pair position (BTA UMD v3.0)                                |
| CEL.LG                 | Deer linkage group                                                      |
| CEL.Order              | Marker order on deer linkage group                                      |
| cMPosition.SexAveraged | sex-averaged linkage map position (cM)                                  |
| cMPosition.Female      | female linkage map position (cM)                                        |
| cMPosition.Male        | male linkage map position (cM)                                          |
| Skeleton.SNP           | indicates if SNP is included in the skeleton map (see main text)        |
| PAR                    | indicates if SNP is in the pseudoautosomal region                       |
| Estimated.Mb.Position  | the estimated genomic position on the deer genome (see methods)         |
| inf.mei                | number of informative meioses                                           |
| inf.mei.PK             | number of informative meioses where grandparental phase was known       |
| tot_f                  | number of informative meioses in females                                |
| tot_m                  | number of informative meioses in males                                  |
| pk_f                   | number of informative meioses in females with phase known               |
| pk_m                   | number of informative meioses in males with phase known                 |
| A1                     | major reference allele                                                  |
| A2                     | minor reference allele                                                  |
| CallRate               | SNP call rate in original dataset ( $N_{IDS} = 2361$ )                  |
| Q.2                    | minor allele frequency                                                  |
| PseudoAutosomalSNP     | indicates if sex-linked SNPs (CEL34) are in the pseudoautosomal region. |

**Table S2:** Data for Figure S5, comparison of map positions between Cattle (bp, build vUMD 3.0), Deer (cM, Build 5) and Sheep (bp, build Oar\_v3.1) for the X chromosome. Table is provided in file TableS2\_X\_Cattle\_Cervus\_Ovis.txt.

**Table S3:** Predicted approximate positions of unmapped SNP loci from Build 5. Table is provided in file TableS3\_Predicted\_Positions\_of\_Unmapped\_Loci.txt. Column headers are as follows:

|                         |                                                                             |
|-------------------------|-----------------------------------------------------------------------------|
| Window.Start            | cM position of the start of the window of most likely position              |
| Window.Stop             | cM position of the end of the window                                        |
| CEL.LG                  | Deer linkage group identifier                                               |
| SNP.Start               | First mapped SNP at the start cM position                                   |
| SNP.Stop                | Last mapped SNP at the end cM position                                      |
| chunk                   | chunk identifier                                                            |
| SNP.Start.Of.Chromosome | Indicates if the most likely position is at the beginning of the chromosome |
| SNP.End.Of.Chromosome   | Indicates if the most likely position is at the end of the chromosome       |
| Unmap.SNP.vec           | Vector of SNPs within the unmapped chunk                                    |
